# Subject Index

## Alphoid satellite DNA

of human Y chromosome: TYLER-SMITH 93

## Antigen

### H-Y

used in analysis of XX hermaphrodites: WIBERG & SCHERER 163

Y chromosome and spermatogenesis: BURGOYNE 133

### Sx5

used in analysis XX hermaphrodites: WIBERG & SCHERER 163

## Autosome

testis-determining genes: DE LA CHAPELLE 33

testis-specific transcripts in human: LEROY, SEBOUN, MATTEI, FELLOUS & BISHOP 177

## Bkm sequences

sex determination in the mouse: ERICKSON, DURBIN & TRES 25

## *Caenorhabditis elegans*

primary sex determination: HODGKIN 5

## Centromere

repeated DNA sequences in human Y chromosome: TYLER-SMITH 93

## Chromosomal rearrangement

genetic analysis of human Y chromosome: PRITCHARD & GOODFELLOW 59

## Chromosome

### human

-mediated gene transfer: PRITCHARD & GOODFELLOW 59

## Cytotoxic T-cell

mapping H-Y gene: SIMPSON AND OTHERS 157

## Deletion mapping

analysis of X-Y interchange males and females: FERGUSON-SMITH, AFFARA & MAGENIS 41

Y-chromosomal gene in gonadoblastoma: PAGE 151

## DNA

### alphoid satellite

in human Y chromosome: TYLER-SMITH 93

### probe

analysis of *Sxr* mutation in mouse: BISHOP AND OTHERS 167

detection of testis-specific transcripts: LEROY, SEBOUN, MATTEI, FELLOUS & BISHOP 177

to map testis-determining locus: MÜLLER 51

to study *TDF* in humans: DE LA CHAPELLE 33

### repeated sequences

in XX/XY mosaic mouse: SINGH, MATSUKUMA & JONES 143

of human Y chromosome: SMITH, YOUNG, TALBOT & SCHMECKPEPER 77

### Y chromosomal

in XX hermaphrodites: WIBERG & SCHERER 163

## Dosage

### compensation

in sex determination in nematodes: HODGKIN 5

## *Drosophila*

genetics of sex determination: NÖTHIGER & STEINMANN-ZWICKY 17

### sex determination

compared with nematodes: HODGKIN 5

## Dysgenetic gonad

gene causing gonadoblastoma: PAGE 151

## Evolution

repeated DNA of human Y chromosome: SMITH, YOUNG, TALBOT & SCHMECKPEPER 77

## Gene

### transfer

chromosome-mediated in human: PRITCHARD & GOODFELLOW 59

## Genetic control

of sex determination in *Drosophila*: NÖTHIGER & STEINMANN-ZWICKY 17

## Genital ambiguity

testis-determining gene in humans: DE LA CHAPELLE 33

## Gonad

### dysgenetic

gene causing gonadoblastoma: PAGE 151

## Gonadoblastoma

caused by Y-chromosomal gene: PAGE 151

## Hermaphrodite

primary sex determination in nematodes: HODGKIN 5  
true in humans: DE LA CHAPELLE 33

## Human

chromosome-mediated gene transfer: PRITCHARD & GOODFELLOW 59

### DNA-derived probe

detection of testis-specific transcripts: LEROY, SEBOUN, MATTEI, FELLOUS & BISHOP 177

### interchanges between X and Y chromosomes:

WEISSENBACH AND OTHERS 67

mapping H-Y gene: SIMPSON AND OTHERS 157

pseudoautosomal genes: GOODFELLOW AND OTHERS 119

telomeres of X and Y chromosomes: COOKE 101

testis-determining gene: DE LA CHAPELLE 33

testis determining locus: MÜLLER 51

### XX males

presence of testicular tissues: WIBERG & SCHERER 163

X-Y interchange males and females: FERGUSON-SMITH, AFFARA & MAGENIS 41

### Y chromosome

gene causes gonadoblastoma: PAGE 151

incomplete coding sequences for steroid sulphatase: FRASER AND OTHERS 127

repeated DNA: SMITH, YOUNG, TALBOT & SCHMECKPEPER 77

repeated structures in centromeric region: TYLER-SMITH 93

### Y-linked genes

sex determination: CRAIG, LEVY & FRASER 185

**H-Y antigen**

used in analysis of XX hermaphrodites: WIBERG & SCHERER 163

Y chromosome in spermatogenesis: BURGOYNE 133

**Hybridization**

*in situ*

mapping the X chromosome: AVNER AND OTHERS 107

**H-Y gene**

mapping in mouse and human: SIMPSON AND OTHERS 157

**Hypospadias**

testis-determining gene in humans: DE LA CHAPELLE 33

**In situ**

hybridization

mapping the X chromosome: AVNER AND OTHERS 107

**Map**

chromosome

analysis of X-Y interchange males and females: FERGUSON-SMITH, AFFARA & MAGENIS 41

deletion

Y-chromosomal gene in gonadoblastoma: PAGE 151

of testis-determining gene: DE LA CHAPELLE 33

X chromosome

of mouse: AVNER AND OTHERS 107

Y chromosome

analysis by gene transfer: PRITCHARD & GOODFELLOW 59

**MIC2**

pseudoautosomal gene in man: GOODFELLOW AND OTHERS 119

use as marker for Y chromosome: PRITCHARD & GOODFELLOW 59

**Minisatellite**

interchanges between X and Y chromosomes: WEISSENBACH AND OTHERS 67

**Molecular organization**

sex-determining gene: CRAIG, LEVY & FRASER 185

**Mosaicism**

XX/YY mosaic in mouse: SINGH, MATSUKUMA & JONES 143

**Mouse**

*Sxr* mutation

use of specific DNA probes: BISHOP AND OTHERS 167

XX/XY mosaic

analysis using repeated DNA sequences: SINGH, MATSUKUMA & JONES 143

Y chromosome

and mapping the X chromosome: AVNER AND OTHERS 107

role in spermatogenesis: BURGOYNE 133

sex determination: ERICKSON, DURBIN & TRES 25

Y-linked genes

sex determination: CRAIG, LEVY & FRASER 185

**Mus spretus**

mapping the X chromosome: AVNER AND OTHERS 107

**Nematode**

*Caenorhabditis elegans*

primary sex determination: HODGKIN 5

**Primate**

evolution and repeated DNA of Y chromosome: SMITH, YOUNG, TALBOT & SCHMECKPEPER 77

**Pseudoautosomal gene**

in man: GOODFELLOW AND OTHERS 119

steroid-sulphatase-related sequences in human: FRASER AND OTHERS 127

**Pseudoautosomal region**

interchanges between X and Y chromosomes:

WEISSENBACH AND OTHERS 67

**Repeated DNA**

in centromeric region of human Y chromosome: TYLER-SMITH 93

in XX/XY mosaic mouse: SINGH, MATSUKUMA & JONES 143

of human Y chromosome: SMITH, YOUNG, TALBOT & SCHMECKPEPER 77

**Sex**

chromosome

and autosomal testis-determining genes: DE LA CHAPELLE 33

determination

in *Drosophila*: NÖTHIGER & STEINMANN-ZWICKY 17

in mouse: ERICKSON, DURBIN & TRES 25

in nematodes: HODGKIN 5

in the mouse: BISHOP AND OTHERS 167

mammalian Y chromosome: CRAIG, LEVY & FRASER 185

Y chromosome and autosomal testis-determining genes: DE LA CHAPELLE 33

reversal

in humans: SIMPSON AND OTHERS 157

in mouse: SIMPSON AND OTHERS 157

interchanges between X and Y chromosomes: WEISSENBACH AND OTHERS 67

in the mouse: BISHOP AND OTHERS 167

testis-determining locus: MÜLLER 51

**Small testes (ST)**

development in XX/XY mosaic: SINGH, MATSUKUMA & JONES 143

**Spermatogenesis**

role of mammalian Y chromosome: BURGOYNE 133

**Steroid sulphatase**

incomplete coding sequences on human Y chromosome: FRASER AND OTHERS 127

sex determination in mammals: CRAIG, LEVY & FRASER 185

**Sxr**

mouse mutation

use of specific DNA probes: BISHOP AND OTHERS 167

**Sxs antigen**

used in analysis of XX hermaphrodites: WIBERG & SCHERER 163

**T cell**

cytotoxic clones to map H-Y gene: SIMPSON AND OTHERS 157

**TDF**

- analysis of human Y chromosome by gene transfer: PRITCHARD & GOODFELLOW 59
- and X–Y interchange males and females: FERGUSON-SMITH, AFFARA & MAGENIS 41
- in humans: DE LA CHAPELLE 33

**Telomere**

- of human X and Y chromosomes: COOKE 101

**Testis**

- determination
  - interchanges between X and Y chromosomes: WEISSENBACH AND OTHERS 67
- determining factor in humans: DE LA CHAPELLE 33
- differentiation in XX males and XY females: MÜLLER 51
- mouse
  - development in XX/XY mosaic: SINGH, MATSUKUMA & JONES 143
- specific transcripts
  - detected by human Y-DNA-derived probe: LEROY, SEBOUN, MATTEI, FELLOUS & BISHOP 177

**Testis-determining factor (see TDF)****X chromosome**

- human
  - telomeres: COOKE 101
- mapping in the mouse: AVNER AND OTHERS 107
- steroid-sulphatase-related sequences: FRASER AND OTHERS 127
- testis-determining genes: DE LA CHAPELLE 33

**X-inactivation**

- pseudoautosomal genes in man: GOODFELLOW AND OTHERS 119

**XX hermaphrodite**

- analysis with antigens: WIBERG & SCHERER 163

**XX male**

- interchanges between X and Y chromosomes: WEISSENBACH AND OTHERS 67
- presence of testicular tissue: WIBERG & SCHERER 163
- testis-determining gene in humans: DE LA CHAPELLE 33
- testis-determining locus: MÜLLER 51

**XY female**

- molecular genetic analysis: MÜLLER 51

**X–Y interchange**

- deletion mapping of Y-specific sequences: FERGUSON-SMITH, AFFARA & MAGENIS 41

**X–Y sequences**

- in the mouse: AVNER AND OTHERS 107

**Y chromosome**

- and autosomal testis-determining genes: DE LA CHAPELLE 33
- DNA-derived probe
  - detection of testis-specific transcripts: LEROY, SEBOUN, MATTEI, FELLOUS & BISHOP 177
- gene causing gonadoblastoma: PAGE 151
- human
  - telomeres: COOKE 101
- incomplete coding sequences for steroid sulphatase: FRASER AND OTHERS 127
- interchanges between human X and Y: WEISSENBACH AND OTHERS 67
- map
  - analysis by gene transfer: PRITCHARD & GOODFELLOW 59
  - analysis of X–Y interchange males and females: FERGUSON-SMITH, AFFARA & MAGENIS 41
  - H–Y gene in humans: SIMPSON AND OTHERS 157
- molecular search for sex-determining gene: FRASER AND OTHERS 127
- repeated DNA: SMITH, YOUNG, TALBOT & SCHMECKPEPER 77
- repeated DNA in centromeric region of human: TYLER-SMITH 93
- role in spermatogenesis: BURGOYNE 133
- sex determination in the mouse: ERICKSON, DURBIN & TRES 25
- specific repeated DNA sequences: SINGH, MATSUKUMA & JONES 143
- Sxr* mutation in mouse: BISHOP AND OTHERS 167
- symmetry with X-chromosome sequences in mouse: AVNER AND OTHERS 107
- testis-determining locus: MÜLLER 51

**Y-DNA**

- in XX hermaphrodites: WIBERG & SCHERER 163

**Y-linked genes**

- sex determination – molecular aspects: CRAIG, LEVY & FRASER 185

**Y-specific DNA sequences**

- analysis of X–Y interchange males and females: FERGUSON-SMITH, AFFARA & MAGENIS 41
